# Supplementary material for: Sleep characteristics in type 1 diabetes and associations with glycemic control: systematic review and meta-analysis
Source: PubMed Central journal article supplement — Sleep Med. Author manuscript; Available in PMC 2022 Oct 12. (PMC9554893; doi:10.1016/j.sleep.2016.03.019), 2016-06-08
Supplement: NIHMS1840826-supplement-2.pdf [file NIHMS1840826-supplement-2.pdf]

**STUDY (AUTHOR, YEAR):**

**Sleep in ADULT type 1 diabetes patients VS control**

**Baseline characteristics of the patients**

|                                     | <b>Type 1 diabetes</b> | <b>Control subjects</b> |
|-------------------------------------|------------------------|-------------------------|
| <b>Number of patients</b>           |                        |                         |
| <b>Age, mean</b>                    |                        |                         |
| <b>% Male</b>                       |                        |                         |
| <b>BMI (kg/m<sup>2</sup>), mean</b> |                        |                         |
| <b>Diabetes duration (years)</b>    |                        |                         |
| <b>HbA1c (mean)</b>                 |                        |                         |

## SLEEP DURATION IN T1DM VS. NORMAL

Method of sleep duration measurement:

- Questionnaire (specify name of questionnaire) \_\_\_\_\_
- Actigraphy                       PSG

### 1. Sleep duration as a continuous variable

|          | N | Sleep duration (Mean) | Sleep duration (SD) |
|----------|---|-----------------------|---------------------|
| T1DM     |   |                       |                     |
| Controls |   |                       |                     |

### 2. Sleep duration as a categorical variable

| Sleep duration | ≤5 h | >5-≤6 h | >6-≤7 h | >7-≤ 8 h | >8-≤9 h | > 9 h |
|----------------|------|---------|---------|----------|---------|-------|
| T1DM (N)       |      |         |         |          |         |       |
| Controls (N)   |      |         |         |          |         |       |

## SLEEP QUALITY IN T1DM VS NORMAL

Method of sleep quality measurement

- Questionnaire (please specify name of questionnaire)
- Actigraphy ( sleep efficiency)
- PSG (sleep efficiency)

### 1. Sleep quality as a continuous variable: Standardized score

|          | N | Sleep quality (Mean) | Sleep quality (SD) |
|----------|---|----------------------|--------------------|
| T1DM     |   |                      |                    |
| Controls |   |                      |                    |

### 2. Sleep quality as a categorical variable

Poor sleep quality defined as (please fill) \_\_\_\_\_

|          | Poor sleep quality | Good sleep quality |
|----------|--------------------|--------------------|
| T1DM (N) |                    |                    |
| Controls |                    |                    |

**OSA IN T1DM VS NORMAL**

Method of OSA measurement

- Questionnaire
- XPSG
- Other (please specify i.e. apnea link, oximetry) \_\_\_\_\_

**1. Severity of OSA as continuous variable**

|          | N | Apnea Hypopnea Index (mean) | Apnea Hypopnea Index (SD) |
|----------|---|-----------------------------|---------------------------|
| T1DM     |   |                             |                           |
| Controls |   |                             |                           |

**2. OSA as categorical variable**

- OSA present is defined as
- High Risk by Questionnaire
  - AHI  $\geq$  5
  - Other (please define) \_\_\_\_\_

|              | OSA present | OSA Absent |
|--------------|-------------|------------|
| T1DM (N)     |             |            |
| Controls (N) |             |            |

**SLEEP STAGES IN T1D VS NORMAL**

| Stage |          | N | % stage ( mean) | % stage (SD) |
|-------|----------|---|-----------------|--------------|
| 1     | T1DM     |   |                 |              |
|       | Controls |   |                 |              |
| 2     | T1DM     |   |                 |              |
|       | Controls |   |                 |              |
| 3     | T1DM     |   |                 |              |
|       | Controls |   |                 |              |

## STUDY (AUTHOR, YEAR)

**Relationship between sleep and glycemia**

Definition of good glycemic control : **HbA1c <7%**

Definition of poor glycemic control: **HbA1c ≥ 7%**

**Baseline characteristics of the patients**

|                                      | <b>ALL</b> | <b>Good Glycemic control<br/>(HbA1c &lt;7%)</b> | <b>Poor Glycemic Control<br/>(HbA1c ≥ 7%)</b> |
|--------------------------------------|------------|-------------------------------------------------|-----------------------------------------------|
| <b>Number of patients</b>            |            |                                                 |                                               |
| <b>Age, mean</b>                     |            |                                                 |                                               |
| <b>% Male</b>                        |            |                                                 |                                               |
| <b>BMI (kg/m<sup>2</sup>), mean</b>  |            |                                                 |                                               |
| <b>Diabetes duration<br/>(years)</b> |            |                                                 |                                               |
| <b>HbA1c, mean</b>                   |            |                                                 |                                               |

**SLEEP DURATION AND GLYCEMIA**

Method of sleep duration measurement:

 Questionnaire
                         
  Actigraphy
                         
  PSG
1. Sleep duration as a continuous variable

|           | N | Mean Sleep Duration | SD Sleep Duration | Note |
|-----------|---|---------------------|-------------------|------|
| HbA1c <7% |   |                     |                   |      |
| HbA1c ≥7% |   |                     |                   |      |

2. Sleep duration as a categorical vs dichotomous/ continuous HbA1c

| Glycemic control | Dichotomous      |                  | HbA1c levels (continuous) |            |          |
|------------------|------------------|------------------|---------------------------|------------|----------|
|                  | HbA1c <7%<br>(N) | HbA1c ≥7%<br>(N) | N                         | Mean HbA1c | SD HbA1c |
| ≤ 5              |                  |                  |                           |            |          |
| >5- ≤ 6          |                  |                  |                           |            |          |
| >6 -≤ 7          |                  |                  |                           |            |          |
| >7 - ≤8          |                  |                  |                           |            |          |
| >8- ≤9           |                  |                  |                           |            |          |
| >9               |                  |                  |                           |            |          |

**SLEEP QUALITY AND GLYCEMIA**Method of sleep quality measurement

- Questionnaire (please specify name of questionnaire)\_\_\_\_\_
- Actigraphy (sleep efficiency)
- PSG (sleep efficiency)

1. Sleep quality as continuous variable

|             | N | Sleep quality (mean) | Sleep quality (SD) |
|-------------|---|----------------------|--------------------|
| HbA1c <7%   |   |                      |                    |
| HbA1c >= 7% |   |                      |                    |

2. Sleep quality as a categorical vs dichotomous/ continuous HbA1c

Poor sleep quality defined as (please fill)\_\_\_\_\_

| Glycemic control   | Dichotomous      |                  | HbA1c levels (continuous) |            |          |
|--------------------|------------------|------------------|---------------------------|------------|----------|
|                    | HbA1c <7%<br>(N) | HbA1c ≥7%<br>(N) | N                         | Mean HbA1c | SD HbA1c |
| Poor sleep quality |                  |                  |                           |            |          |
| Good sleep quality |                  |                  |                           |            |          |

**OBSTRUCTIVE SLEEP APNEA (OSA) AND GLYCEMIA**

Method of OSA measurement

- Questionnaire
- PSG
- Other (please specify i.e. apnea link, oximetry) \_\_\_\_\_

1. OSA severity as continuous variable

|           | N | HbA1c mean | HbA1c SD |
|-----------|---|------------|----------|
| AHI <5    |   |            |          |
| AHI 5-15  |   |            |          |
| AHI 15-30 |   |            |          |
| AHI ≥30   |   |            |          |

|            | N | AH(mean) | AHI (SD) |
|------------|---|----------|----------|
| HbA1c <7%  |   |          |          |
| HbA1c ≥ 7% |   |          |          |

2. OSA as categorical variable

- OSA defined as
- AHI ≥ 5
- High Risk by Berlin Questionnaire
- Other (please define) \_\_\_\_\_

|             | N | Mean HbA1c | SD HbA1c |
|-------------|---|------------|----------|
| OSA present |   |            |          |
| OSA absent  |   |            |          |

**SLEEP STAGES AND GLYCEMIA**

Sleep measured by

- PSG
- Other (please specify) \_\_\_\_\_

Sleep stages as continuous variables

| Stage |            | N | % Stage (mean) | % Stage (SD) |
|-------|------------|---|----------------|--------------|
| 1     | HbA1c <7%  |   |                |              |
|       | HbA1c ≥ 7% |   |                |              |
| 2     | HbA1c <7%  |   |                |              |
|       | HbA1c ≥ 7% |   |                |              |
| 3     | HbA1c <7%  |   |                |              |
|       | HbA1c ≥ 7% |   |                |              |



STUDY (AUTHOR, YEAR): \_\_\_\_\_

Sleep in Children: type 1 diabetes patients VS control

Baseline characteristics of the patients

|                                           | Type 1 diabetes | Control subjects |
|-------------------------------------------|-----------------|------------------|
| Number of patients                        |                 |                  |
| Age, mean                                 |                 |                  |
| % Male                                    |                 |                  |
| BMI (kg/m <sup>2</sup> ), mean or z-score |                 |                  |
| Diabetes duration (years)                 |                 | N/A              |
| HbA1c (mean)                              |                 | N/A              |

## SLEEP DURATION IN T1DM VS. Control

Method of sleep duration measurement:

- Questionnaire (specify name of questionnaire) \_\_\_\_\_
- Actigraphy                       PSG

### 1. Sleep duration as a continuous variable

|          | N | Sleep duration (Mean) | Sleep duration (SD) |
|----------|---|-----------------------|---------------------|
| T1DM     |   |                       |                     |
| Controls |   |                       |                     |

### 2. Sleep duration as a categorical variable

| Sleep duration | ≤8 h | >8-≤9 h | >9-≤10 h | >10-≤11 h | >11 h |
|----------------|------|---------|----------|-----------|-------|
| T1DM (N)       |      |         |          |           |       |
| Controls (N)   |      |         |          |           |       |

## SLEEP QUALITY IN T1DM VS Control

Method of sleep quality measurement

- Questionnaire (please specify name of questionnaire) \_\_\_\_\_
- Actigraphy (sleep efficiency)
- PSG (sleep efficiency)

### 1. Sleep quality as a continuous variable

|          | N | Sleep quality (Mean) | Sleep quality (SD) |
|----------|---|----------------------|--------------------|
| T1DM     |   |                      |                    |
| Controls |   |                      |                    |

### 2. Sleep quality as a categorical variable

Poor sleep quality defined as (please fill) \_\_\_\_\_

|          | Poor sleep quality | Good sleep quality |
|----------|--------------------|--------------------|
| T1DM (N) |                    |                    |
| Controls |                    |                    |

**OSA IN T1DM VS Control**

Method of OSA measurement

- Questionnaire
- PSG
- Other (please specify i.e. apnea link, oximetry) \_\_\_\_\_

**1. Severity of OSA as continuous variable**

|          | N | Apnea Hypopnea Index (mean) | Apnea Hypopnea Index (SD) |
|----------|---|-----------------------------|---------------------------|
| T1DM     |   |                             |                           |
| Controls |   |                             |                           |

**2. OSA as categorical variable**

- OSA present is defined as
- High Risk by Questionnaire
  - AHI  $\geq 1.5$
  - Other (please define) \_\_\_\_\_

|              | OSA present | OSA Absent |
|--------------|-------------|------------|
| T1DM (N)     |             |            |
| Controls (N) |             |            |

**SLEEP STAGES IN T1D VS Control**

| Stage |          | N | % stage ( mean) | % stage (SD) |
|-------|----------|---|-----------------|--------------|
| 1     | T1DM     |   |                 |              |
|       | Controls |   |                 |              |
| 2     | T1DM     |   |                 |              |
|       | Controls |   |                 |              |
| 3     | T1DM     |   |                 |              |
|       | Controls |   |                 |              |

**STUDY (AUTHOR, YEAR)**

**Relationship between sleep and glycemia in children**

Definition of good glycemic control : **HbA1c <7.5%**

Definition of poor glycemic control: **HbA1c ≥ 7.5%**

**Baseline characteristics of the patients**

|                                                | <b>Good Glycemic control<br/>(HbA1c &lt;7.5%)</b> | <b>Poor Glycemic Control<br/>(HbA1c ≥ 7.5%)</b> | <b>Total sample</b> |
|------------------------------------------------|---------------------------------------------------|-------------------------------------------------|---------------------|
| <b>Number of patients</b>                      |                                                   |                                                 |                     |
| <b>Age, mean</b>                               |                                                   |                                                 |                     |
| <b>% Male</b>                                  |                                                   |                                                 |                     |
| <b>BMI (kg/m<sup>2</sup>), mean or z-score</b> |                                                   |                                                 |                     |
| <b>Diabetes duration (years)</b>               |                                                   |                                                 |                     |
| <b>HbA1c (mean)</b>                            |                                                   |                                                 |                     |

**Relationship between sleep duration and glycemia in T1D children**

**Baseline characteristics of the patients**

| <b>Characteristics</b>                         | <b>AGE 6-13 yrs</b> | <b>AGE &gt;13-17</b> |
|------------------------------------------------|---------------------|----------------------|
|                                                | <b>N =</b>          | <b>N=</b>            |
| <b>% Male</b>                                  |                     |                      |
| <b>BMI (kg/m<sup>2</sup>), mean or z score</b> |                     |                      |
| <b>Diabetes duration (years)</b>               |                     |                      |
| <b>HbA1c</b>                                   |                     |                      |

Method of sleep duration measurement:

Questionnaire (please indicate) \_\_\_\_\_

Objective measurement (please indicate) \_\_\_\_\_

1. Mean sleep duration by HbA1c groups

| Age, yr | HbA1c | n | Mean | SD | Note |
|---------|-------|---|------|----|------|
| 6-13    | <7.5% |   |      |    |      |
|         | ≥7.5% |   |      |    |      |
| >13-17  | <7.5% |   |      |    |      |
|         | ≥7.5% |   |      |    |      |

2. Mean HbA1C by sleep duration groups

| Age, yr | Sleep duration (h) | HbA1c levels (continuous) |      |    |
|---------|--------------------|---------------------------|------|----|
|         |                    | N                         | Mean | SD |
| 6-13    | <9                 |                           |      |    |
|         | ≥ 9                |                           |      |    |
| >13-17  | Sleep duration (h) | N                         | Mean | SD |
|         | <8                 |                           |      |    |
|         | ≥ 8                |                           |      |    |

**SLEEP QUALITY AND GLYCEMIA**

Method of sleep quality measurement

- Questionnaire (please specify name of questionnaire)\_\_\_\_\_
- Actigraphy (sleep efficiency)
- PSG (sleep efficiency)

1. Sleep quality as continuous variable

|              | N | Age<br>(mean± SD) | Sex<br>(%male) | BMI<br>(mean ±SD) | Sleep quality<br>(mean ±SD) |
|--------------|---|-------------------|----------------|-------------------|-----------------------------|
| HbA1c <7.5%  |   |                   |                |                   |                             |
| HbA1c ≥ 7.5% |   |                   |                |                   |                             |

2. Sleep quality as a categorical vs dichotomous/ continuous HbA1c

Poor sleep quality defined as (please fill)\_\_\_\_\_

Please fill in the number of patients under dichotomous columns. For HbA1c levels, please fill in number of patients in each sleep quality category, along with their mean HbA1c levels and standard deviation.

| Glycemic control   | Dichotomous       |                    | HbA1c levels (continuous) |            |          |
|--------------------|-------------------|--------------------|---------------------------|------------|----------|
|                    | HbA1c <7.5<br>(N) | HbA1c ≥7.5%<br>(N) | N                         | Mean HbA1c | SD HbA1c |
| Poor sleep quality |                   |                    |                           |            |          |
| Good sleep quality |                   |                    |                           |            |          |

## OBSTRUCTIVE SLEEP APNEA (OSA) AND GLYCEMIA

### Method of OSA measurement

- Questionnaire  
 PSG  
 Other (please specify i.e. apnea link, oximetry) \_\_\_\_\_

### 1. OSA severity vs. continuous/ dichotomous HbA1c

OSA severity is indicated by Apnea Hypopnea Index (AHI), obtained from PSG.

| Glycemic control        | Dichotomous     |                 | HbA1c levels (continuous) |            |          |
|-------------------------|-----------------|-----------------|---------------------------|------------|----------|
|                         | HbA1c <7.5% (N) | HbA1c ≥7.5% (N) | N                         | Mean HbA1c | SD HbA1c |
| AHI <5 (or 1.5 in kids) |                 |                 |                           |            |          |
| AHI 5- <15              |                 |                 |                           |            |          |
| AHI 15- <30             |                 |                 |                           |            |          |
| AHI ≥30                 |                 |                 |                           |            |          |

### 2. Overall AHI vs dichotomous HbA1c

|              | N | Mean AHI | SD AHI |
|--------------|---|----------|--------|
| HbA1c <7.5%  |   |          |        |
| HbA1c ≥ 7.5% |   |          |        |

### 3. OSA as categorical variable

- OSA defined as
- AHI ≥ 1.5  
 High Risk by Berlin Questionnaire  
 Other (please define) \_\_\_\_\_

|             | N | Mean HbA1c | SD HbA1c |
|-------------|---|------------|----------|
| OSA present |   |            |          |
| OSA absent  |   |            |          |

**SLEEP STAGES AND GLYCEMIA**

Sleep measured by

- PSG
- Other (please specify)\_\_\_\_\_

Sleep stages as continuous variables

| Stage |              | N | % Stage (mean) | % Stage (SD) |
|-------|--------------|---|----------------|--------------|
| 1     | HbA1c <7.5%  |   |                |              |
|       | HbA1c ≥ 7.5% |   |                |              |
| 2     | HbA1c <7.5%  |   |                |              |
|       | HbA1c ≥ 7.5% |   |                |              |
| 3     | HbA1c <7.5%  |   |                |              |
|       | HbA1c ≥ 7.5% |   |                |              |
